# Supplementary material for: Ink-jet patterning of graphene by cap assisted barrier-guided CVD
Source: Royal Society of Chemistry journal article supplement (doi:10.1039/c9ra03117k), 2019-01-01
Supplement: c9ra03117k1.pdf [file c9ra03117k1.pdf]

## Ink-jet patterning of graphene by cap assisted barrier-guided CVD

Received 00th January 20xx,

Accepted 00th January 20xx

DOI: 10.1039/x0xx00000x

[www.rsc.org/](http://www.rsc.org/)

Supplementary Fig. S1

indicated that Cu was converted into Cu<sub>2</sub>O through thermal-oxidation during the annealing process.

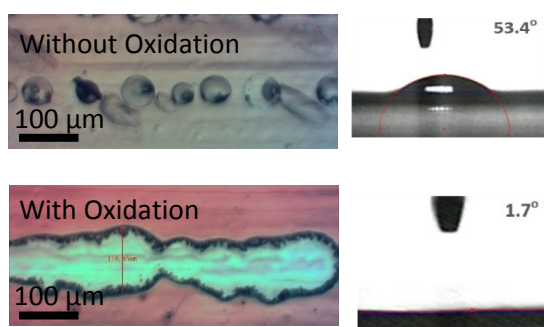

### XRD analysis

According to XRD spectrum, the printed Al<sub>2</sub>O<sub>3</sub> XRD peaks show the  $\gamma$ -Al<sub>2</sub>O<sub>3</sub> phase at 47.48°, which indicated  $\gamma$ -Al<sub>2</sub>O<sub>3</sub> phases present before annealing process (Figure 2(a) green line, and Figure 2(b)).

For the free flow condition as annealing with H<sub>2</sub> only, without spacer and cap situation, Al<sub>2</sub>O<sub>3</sub> barriers were etched away (Figure (c)), and XRD peaks only present Cu crystal peaks at 43.28°, 50.40°, corresponding to (111), (200), respectively (JCPDS Copper: 04-0836)(Figure 2 blue line).

Under the annealing with Ar condition (Figure 2(a), black line and Figure 2 (d)) was to mimic the Al<sub>2</sub>O<sub>3</sub> barriers annealing process with the cap and spacer condition, which is to consider the limited H<sub>2</sub> gas flow during the annealing process. As the Figure 2 black line and Figure (d) shown the  $\alpha$ -Al<sub>2</sub>O<sub>3</sub> present after annealed with Ar only, which may imply that the  $\gamma$ -Al<sub>2</sub>O<sub>3</sub> can be preserved without H<sub>2</sub> etching and convert into a stable  $\alpha$ -Al<sub>2</sub>O<sub>3</sub> in the real condition.

Notice that Cu<sub>2</sub>O (111), (200) (JCPDS card, no# 125678-2076) (Figure 2 blue line) phase appeared after annealing with Ar only process, and no strong Cu (111) and (200) present, which

<sup>a</sup> Graduate Institute of Opto-Mechatronics, National Chung Cheng University, Chiayi, 62102, Taiwan E-mail: [yphsieh@ccu.edu.tw](mailto:yphsieh@ccu.edu.tw)

<sup>b</sup> Department of Physics, National Taiwan University, Tainan, 106, Taiwan

E-mail: [corresponding to: yphsieh@gate.sinica.edu.tw](mailto:corresponding to: yphsieh@gate.sinica.edu.tw)

Electronic Supplementary Information (ESI) available: [Microscope images and complete Raman spectra]. See DOI: 10.1039/x0xx00000x
